# Supplementary material for: Evaluating HIV Educational Materials for Older People
Source: PubMed Central journal article supplement — J Int Assoc Provid AIDS Care. 2019 May 27;18:2325958219849054. doi: 10.1177/2325958219849054 (PMC6748553; doi:10.1177/2325958219849054), 2019-05-27
Supplement: 032519Scorecard_for_Evaluation_HIV_PEM.pdf [file 032519Scorecard_for_Evaluation_HIV_PEM.pdf]

## Scorecard for HIV/AIDS print publications Targeting Older Adults

Data source \_\_\_\_\_ Format \_\_\_\_\_ Publication \_\_\_\_\_  
 Publication year \_\_\_\_\_ Publisher \_\_\_\_\_

| <b>Recommendation 1<sup>1</sup></b>                                                                                                                        |       |            |           |
|------------------------------------------------------------------------------------------------------------------------------------------------------------|-------|------------|-----------|
| Raise Older Adults' Perceived Sense of Susceptibility to HIV/AIDS                                                                                          |       |            |           |
|                                                                                                                                                            | Yes=5 | Somewhat=3 | Absent= 0 |
| 1. Examine myths and stigmas regarding lifestyle practices                                                                                                 |       |            |           |
| 2. Incorporate messages to counter societal misconceptions related to "low or no" HIV risk.                                                                |       |            |           |
| 3. Include a personal HIV/AIDS risk assessment tool.                                                                                                       |       |            |           |
| 4. Explore whether a social, sexual, and substance abuse history has been included as part of one's general health history.                                |       |            |           |
| 5. Reinforce that physiological changes (e.g., vaginal dryness, thinning of vaginal walls, etc.) can increase risks for HIV/AIDS and other STDs.           |       |            |           |
| 6. Provide descriptive case histories of older adults living with HIV/AIDS.                                                                                |       |            |           |
| 7. Discuss potential vulnerabilities due to age-related losses and changing life circumstances and greater likelihood of engaging in high-risk activities. |       |            |           |

| <b>Recommendation 2<sup>2</sup></b>                                                                                                          |       |            |           |
|----------------------------------------------------------------------------------------------------------------------------------------------|-------|------------|-----------|
| Provide Appropriate HIV/AIDS Factual Information                                                                                             |       |            |           |
|                                                                                                                                              | Yes=5 | Somewhat=3 | Absent= 0 |
| 1. Include facts on how HIV infection can progress to later stages of AIDS.                                                                  |       |            |           |
| 2. Relay possible signs and symptoms of HIV/AIDS and discuss asymptomatic                                                                    |       |            |           |
| 3. Stress specific details regarding HIV transmission and risk behaviors.                                                                    |       |            |           |
| 4. Include basic facts on ways that HIV cannot be transmitted through casual contact                                                         |       |            |           |
| 5. Review blood screening timeliness (e.g., history of blood transfusions received abroad since the late 1970s).                             |       |            |           |
| 6. Provide age-related physiological considerations that may enhance HIV/ STD/sexually transmitted infection (STI) transmission.             |       |            |           |
| 7. STD/sexually transmitted infection (STI) transmission.                                                                                    |       |            |           |
| 8 Emphasize that the absence of pregnancy risks does not reduce the likelihood of contracting an HIV/STD (STI).                              |       |            |           |
| 9. Discuss the importance of seeking medical attention for the proper interpretation of HIV/AIDS signs and symptoms.                         |       |            |           |
| 10. Communicate that HIV/AIDS signs and symptoms including opportunistic infections may be mistaken for a chronic disease or "normal aging." |       |            |           |

<sup>1</sup> Recommendation 1 score: \_\_\_\_\_

<sup>2</sup> Recommendation 2 score: \_\_\_\_\_

| <b>Recommendation 3<sup>3</sup></b>                                                                                                                                                                     |       |            |           |
|---------------------------------------------------------------------------------------------------------------------------------------------------------------------------------------------------------|-------|------------|-----------|
| Incorporate Specific HIV/AIDS Risk Reduction Strategies                                                                                                                                                 |       |            |           |
|                                                                                                                                                                                                         | Yes=5 | Somewhat=3 | Absent= 0 |
| 1. Provide specific strategies for implementing safer sex practices with new sexual relationships                                                                                                       |       |            |           |
| 2. Include specific ideas and potential scripts to foster frank communication with family, friends, and health care practitioners about lifestyle behaviors (including sex and substance misuse/abuse). |       |            |           |
| 3. Emphasize specific lifestyle behaviors that can lower their risks of HIV/AIDS including not sharing needles, avoiding substance misuse/abuse, abstinence, and safer sex practices.                   |       |            |           |
| 4. List specific steps and provide detailed instructions on the use of latex and protective barriers during sexual activities.                                                                          |       |            |           |
| 5. Define specific strategies for effective condom use that consider potential loss of penile erection, latex allergies, or use of sexual enhancement drugs.                                            |       |            |           |
| 6. Include specific HIV/AIDS risk reduction strategies that consider same gender and opposite gender partners.                                                                                          |       |            |           |
| 7. Include specific HIV/AIDS risk reduction strategies that take into consideration cultural beliefs and values among diverse populations.                                                              |       |            |           |

| <b>Recommendation 4<sup>4</sup></b>                                                                                                                  |       |            |           |
|------------------------------------------------------------------------------------------------------------------------------------------------------|-------|------------|-----------|
| Emphasize Early Intervention-Testing and Treatment Options                                                                                           |       |            |           |
|                                                                                                                                                      | Yes=5 | Somewhat=3 | Absent= 0 |
| 1. Discuss the benefits of HIV antibody testing to detect HIV in early stages.                                                                       |       |            |           |
| 2. Reinforce that persons must be tested to determine their HIV status and the significance of the “window period.”                                  |       |            |           |
| 3. Stress that asymptomatic at-risk older adults should engage in HIV testing.                                                                       |       |            |           |
| 4. Explain the meaning of positive and negative HIV antibody test results.                                                                           |       |            |           |
| 5. Address the threat of HIV/AIDS as a life-threatening illness and the benefits to seeking early treatment.                                         |       |            |           |
| 6. Assist older adults in confronting fears about HIV infection and fears of social isolation.                                                       |       |            |           |
| 7. List specific community resources, with contact numbers, that are able to provide HIV/AIDS counseling, testing, treatment, and referral services. |       |            |           |
| 8. Explore considerations for older adults who may be primary caregivers for a spouse, partner(s), adult children, or grandchildren with AIDS.       |       |            |           |

<sup>3</sup> Recommendation 3 score: \_\_\_\_\_

<sup>4</sup> Recommendation 4 score: \_\_\_\_\_

| <b>Content Presentation<sup>5</sup></b>                                                                                                                                       |                  |                 |               |
|-------------------------------------------------------------------------------------------------------------------------------------------------------------------------------|------------------|-----------------|---------------|
|                                                                                                                                                                               | Yes, very much=3 | About average=2 | No, not all=1 |
| 1. To stimulate interest, motivational messages are needed.                                                                                                                   |                  |                 |               |
| 2. To provide clear and coherent educational messages, include practical suggestions on ways to reduce HIV risks and the benefits of practicing risk reduction behaviors      |                  |                 |               |
| 3. To enhance application of the desired behaviors, informational messages should stress culturally sensitive and practical ways of implementing HIV risk reduction behaviors |                  |                 |               |
| 4. To increase awareness, a brief HIV risk assessment tool should be included.                                                                                                |                  |                 |               |
| 5. To personalize the educational material, incorporate a variety of case histories describing older adults dealing with a variety of life changes.                           |                  |                 |               |
| 6. Repeat main points multiple times.                                                                                                                                         |                  |                 |               |

| <b>Visual Appropriateness<sup>6</sup></b>                                                                                                                                                                                    |                  |                 |               |
|------------------------------------------------------------------------------------------------------------------------------------------------------------------------------------------------------------------------------|------------------|-----------------|---------------|
|                                                                                                                                                                                                                              | Yes, very much=3 | About average=2 | No, not all=1 |
| 1. To accommodate visual changes in later adulthood, written material should be printed in bold 20-point serif font, with strategic underlining/highlighting/ borders to emphasize primary messages and enhance readability. |                  |                 |               |
| 2. To complement textual messages, images of older adults and reinforcing visuals are needed.                                                                                                                                |                  |                 |               |
| 3. To enhance readability for older persons with lower literacy levels, educational materials written at a sixth-grade reading level should be available.                                                                    |                  |                 |               |
| 4. To address generational differences in comprehension of word usage, terminology should not include slang, and the usage of acronyms should be minimal.                                                                    |                  |                 |               |
| 5. Limited number of key points                                                                                                                                                                                              |                  |                 |               |
| 6. Offer a manageable number of action steps                                                                                                                                                                                 |                  |                 |               |

Flesch Reading Ease: \_\_\_\_\_ Flesch-Kincaid Grade level: \_\_\_\_\_ SMOG Readability \_\_\_\_\_

### **Distribution Method**

Print copy

\_\_\_\_\_

<sup>5</sup> Content presentation score \_\_\_\_\_

<sup>6</sup> Visual Appropriateness score \_\_\_\_\_

STATE:

On-line  
Mail
